# Supplementary material
Source: PubMed Central journal article supplement (PMC3031373)
Supplement: supp_124_4_622__8.pdf [file supp_124_4_622__8.pdf]

## A

N-terminal Ndc80/Hec1 sequence alignment

```
MKRSSVSSGGAGRLSMQELRSQDVNKQGLYTPQTKEKPTFGKLSIN-----KPTSERKVSIFGKRTSGHGSR 67 H. sapiens
MKCSSVSSGAHGRQSMQSLRSQDFNKQGLYTPQTKERPAFWKLSISRLLTPGTSTSERKISIFGKGASGPGSR 72 P. tridactylis
MFGDRRKTGGLNLNGRASIAITPTKRFTDYTGSTSVRKTDPARPSLS-----QPRVSLFNTKNSSVAPR 63 C. elegans
* . .:* . . . .: .: .: ** .* .: : : * . : :***.. *. ..*
```

## B

Aurora B kinase phosphorylation sites mapped within the N-terminus of Ndc80/Hec1:

|                                                              |                                                                                                                                          |
|--------------------------------------------------------------|------------------------------------------------------------------------------------------------------------------------------------------|
| <i>H. sapiens</i> : S4, S5, S8, S15, S44, T49, S55, S62, S69 | Nousiainen et al., 2006<br>DeLuca et al., 2006<br>Ciferri et al., 2009<br>Brill et al., 2009<br>Malik et al., 2009<br>Olsen et al., 2010 |
| <i>C. elegans</i> : T8, S18, S44, S51                        | Cheeseman et al., 2006                                                                                                                   |
| <i>S. cerevisiae</i> : S37, T54, T74, S100                   | Cheeseman et al., 2002<br>Akiyoshi et al., 2009                                                                                          |
