# Supplementary material
Source: PubMed Central journal article supplement (PMC3031373)

A

PtK1 Hec1 RNAi

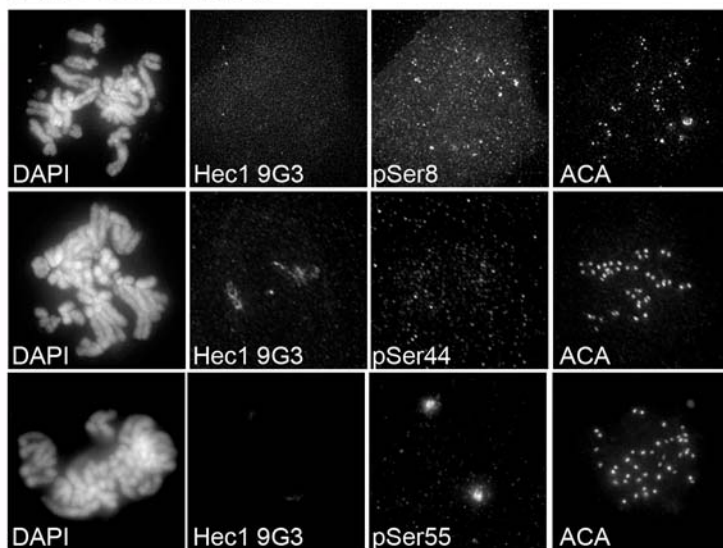

HeLa Hec1 RNAi

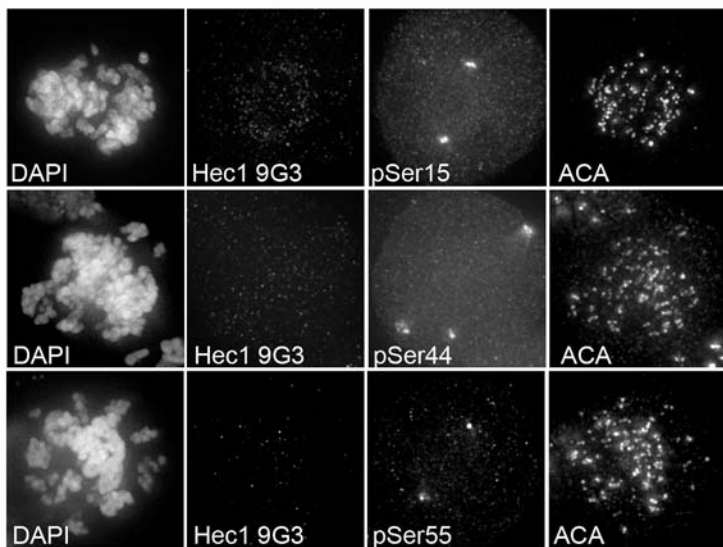

B

PtK1

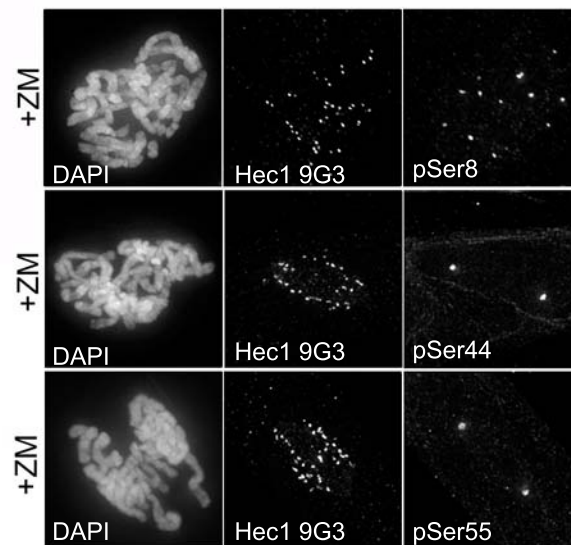

HeLa

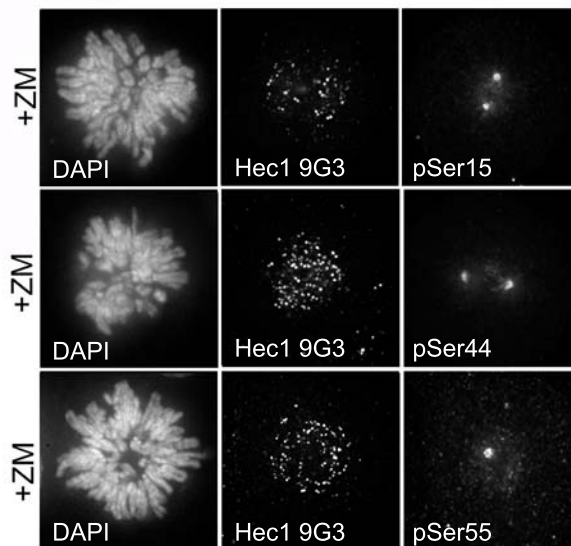

Supplement: supp_124_4_622__1.pdf [file supp_124_4_622__1.pdf]

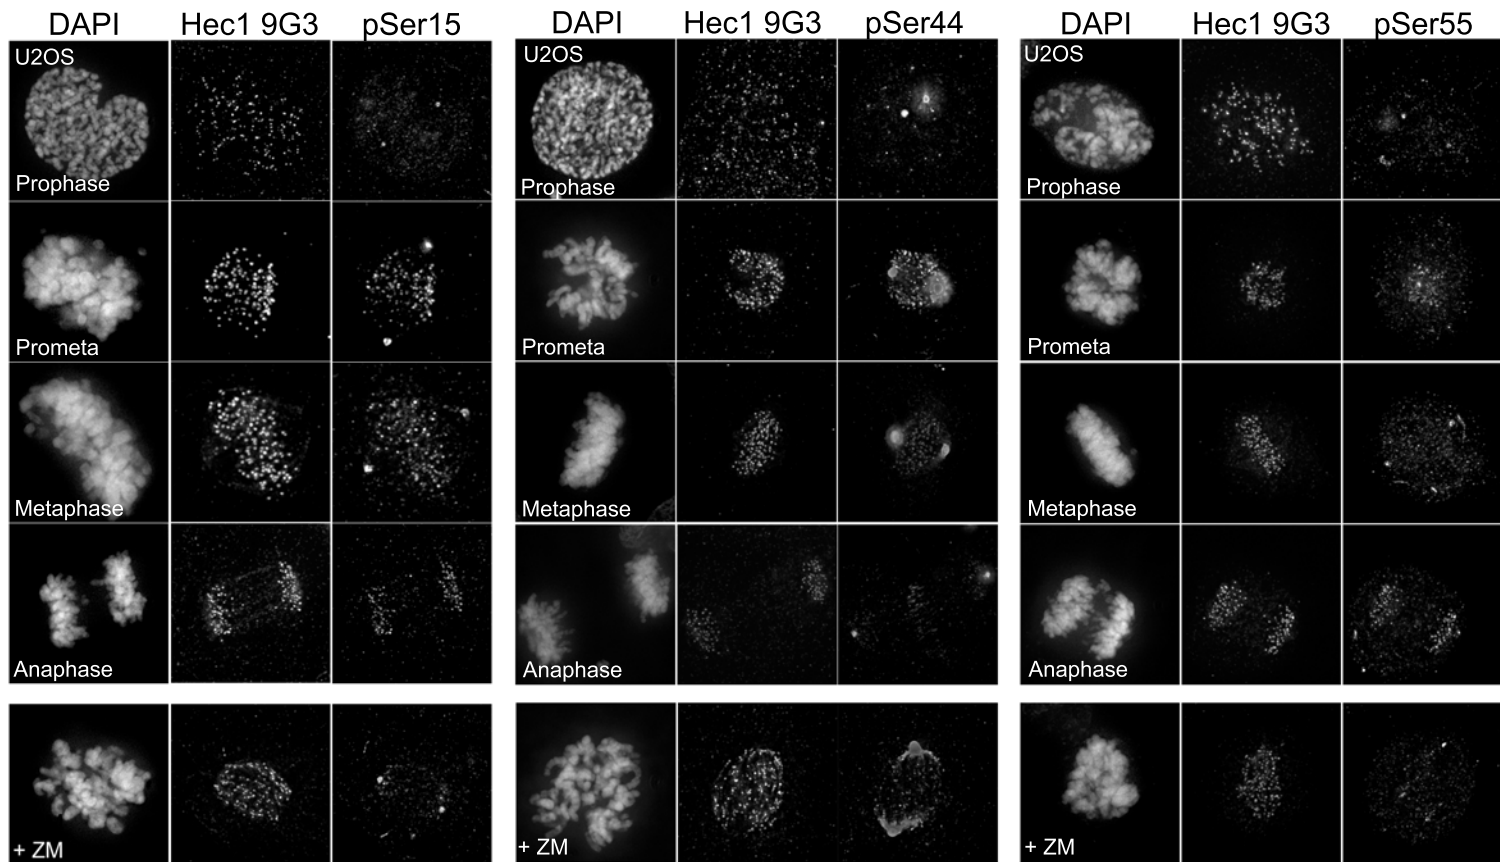

Supplement: supp_124_4_622__2.pdf [file supp_124_4_622__2.pdf]

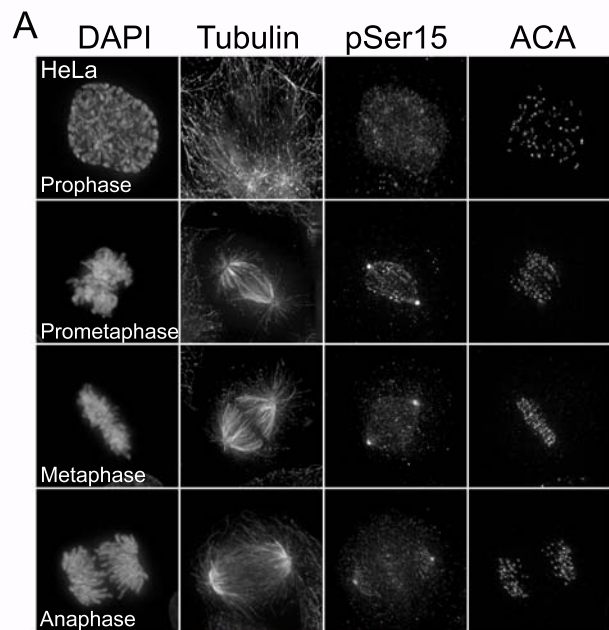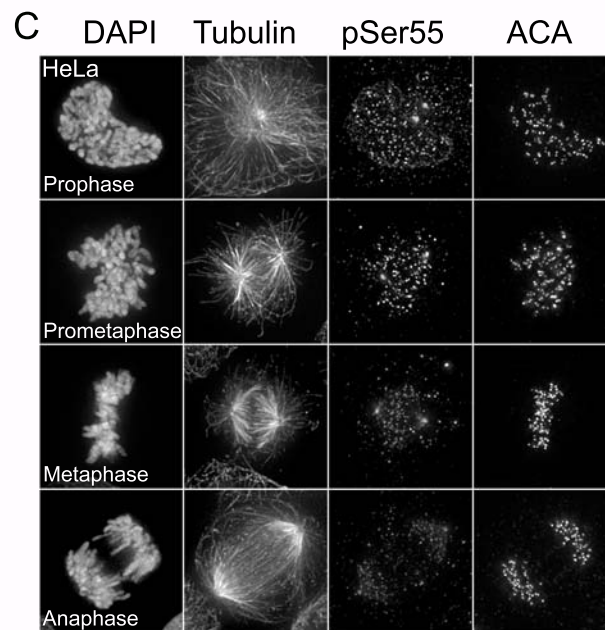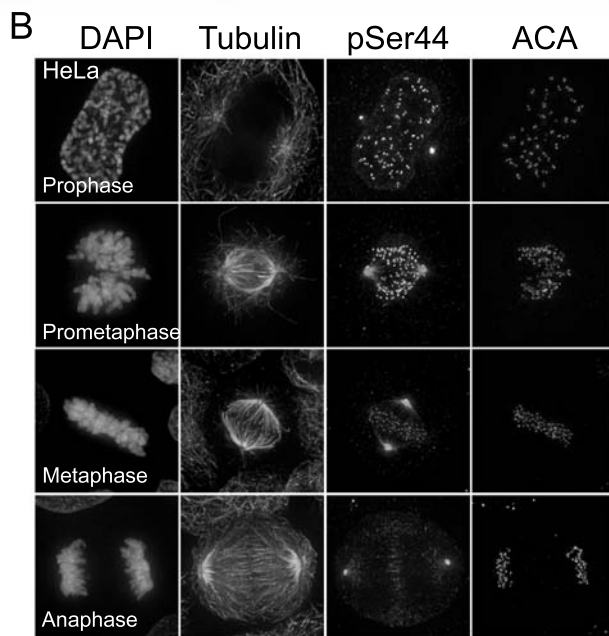

Supplement: supp_124_4_622__3.pdf [file supp_124_4_622__3.pdf]

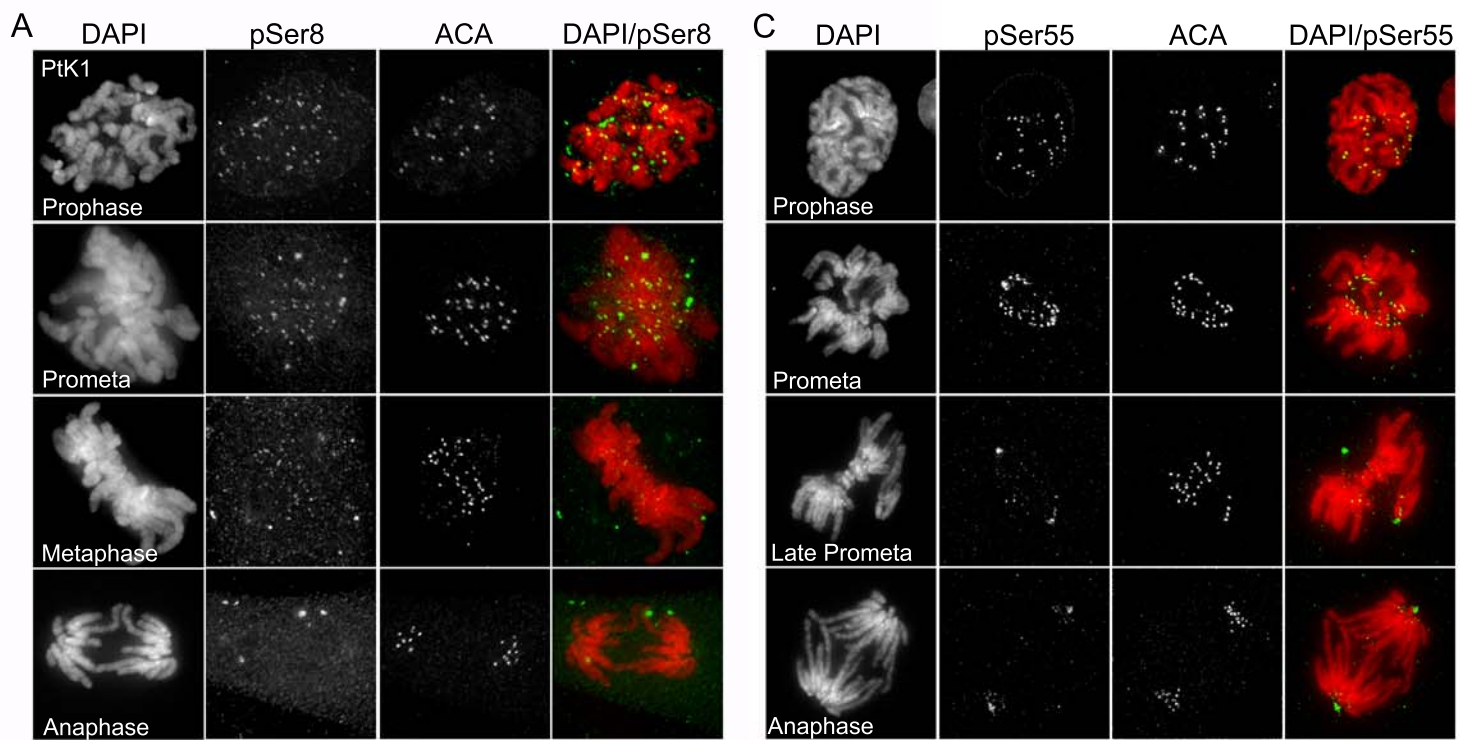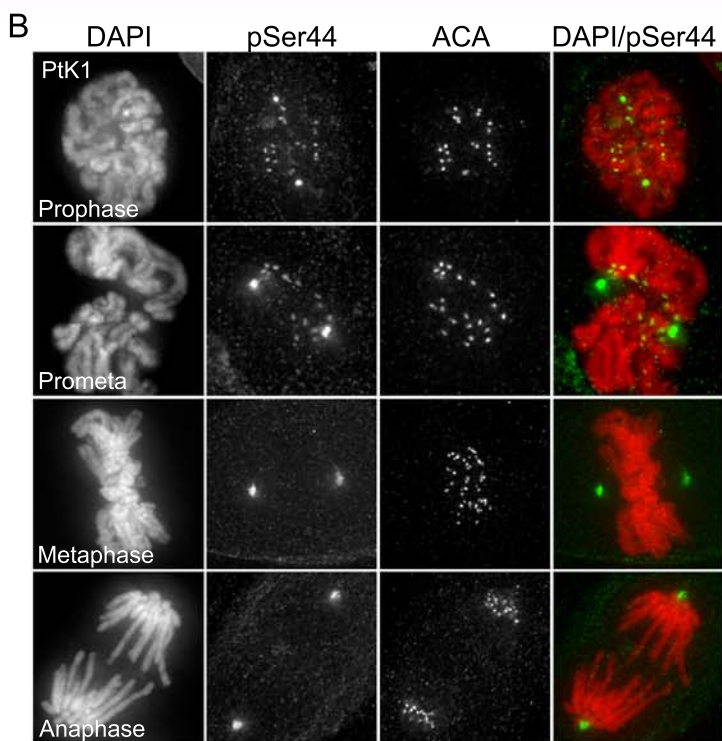

Supplement: supp_124_4_622__4.pdf [file supp_124_4_622__4.pdf]

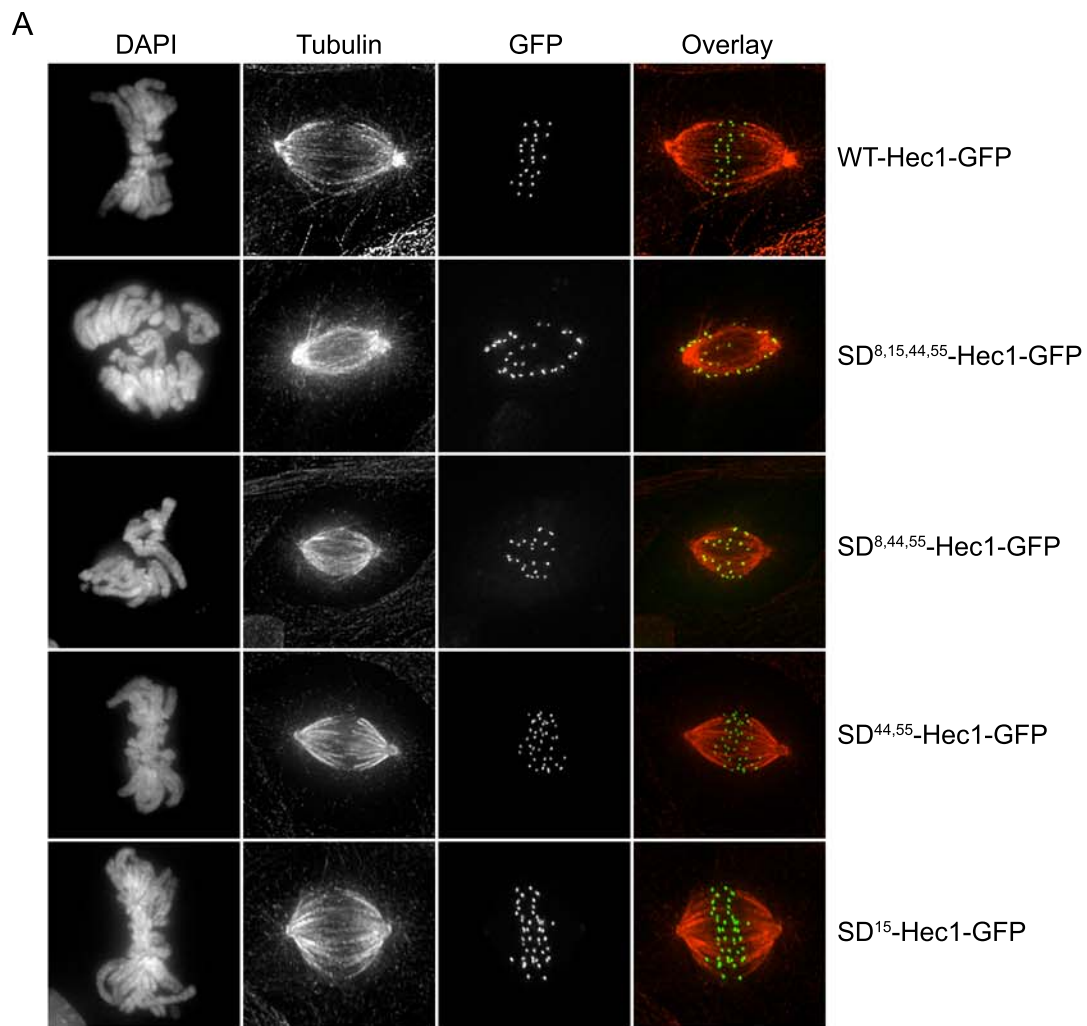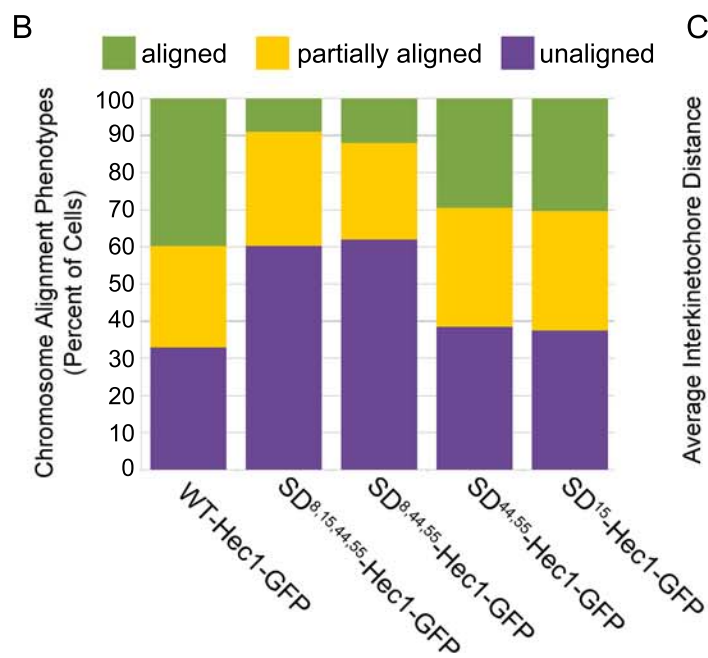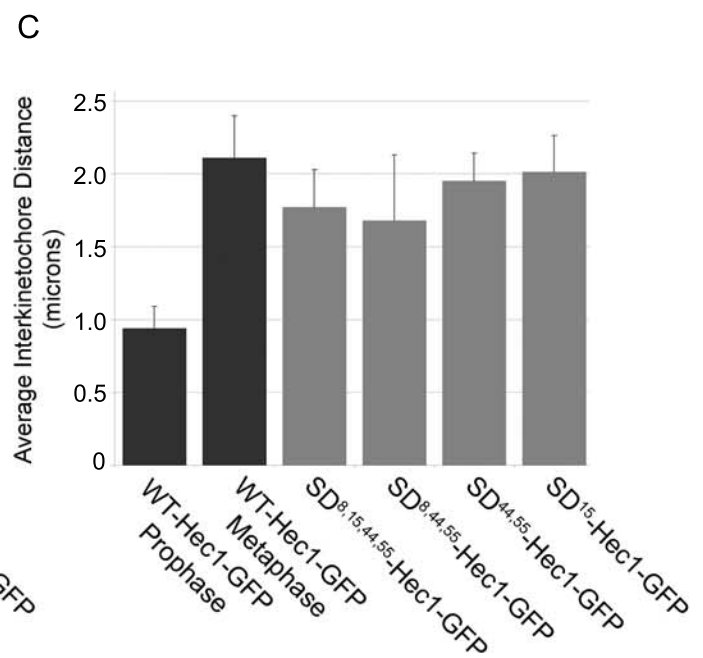

Supplement: supp_124_4_622__5.pdf [file supp_124_4_622__5.pdf]

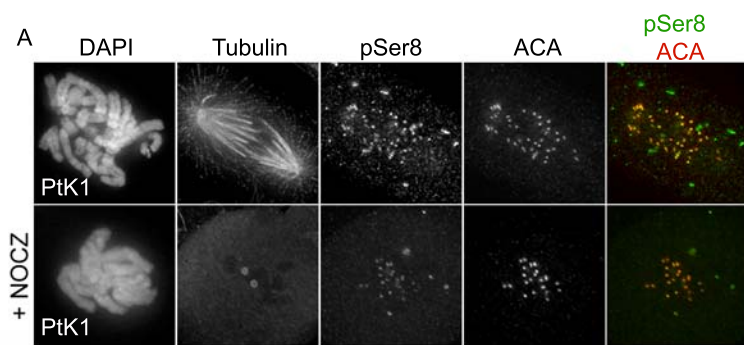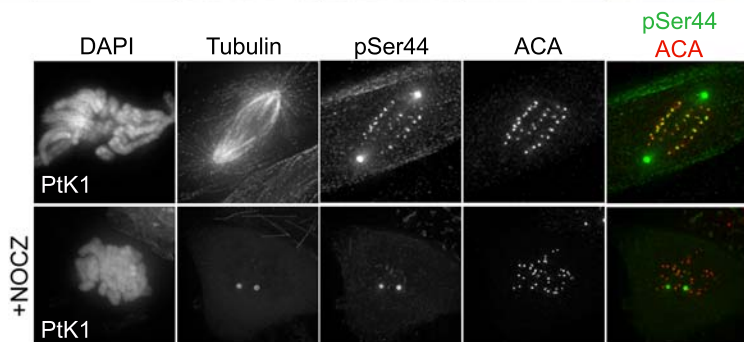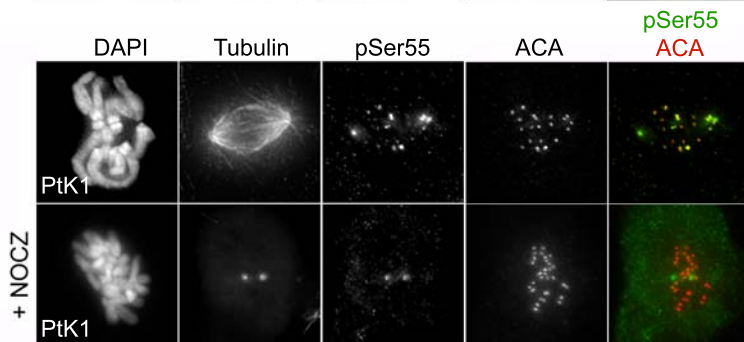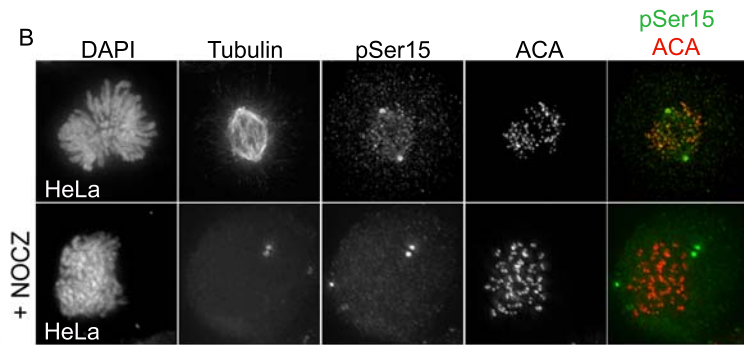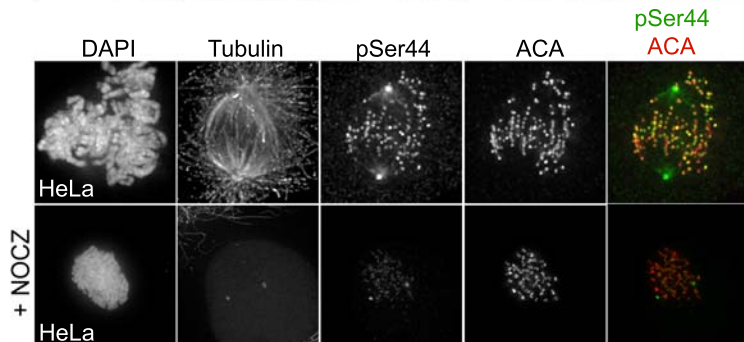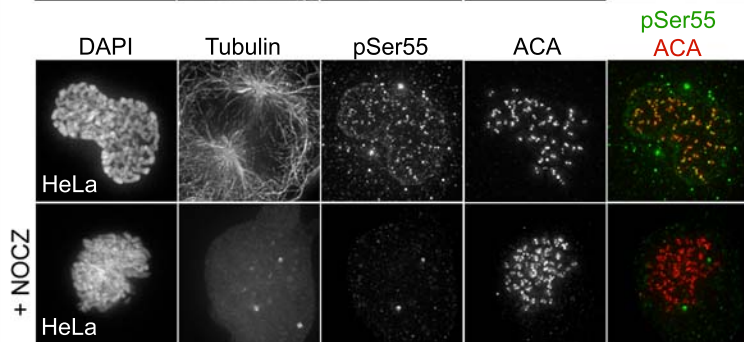

Supplement: supp_124_4_622__6.pdf [file supp_124_4_622__6.pdf]

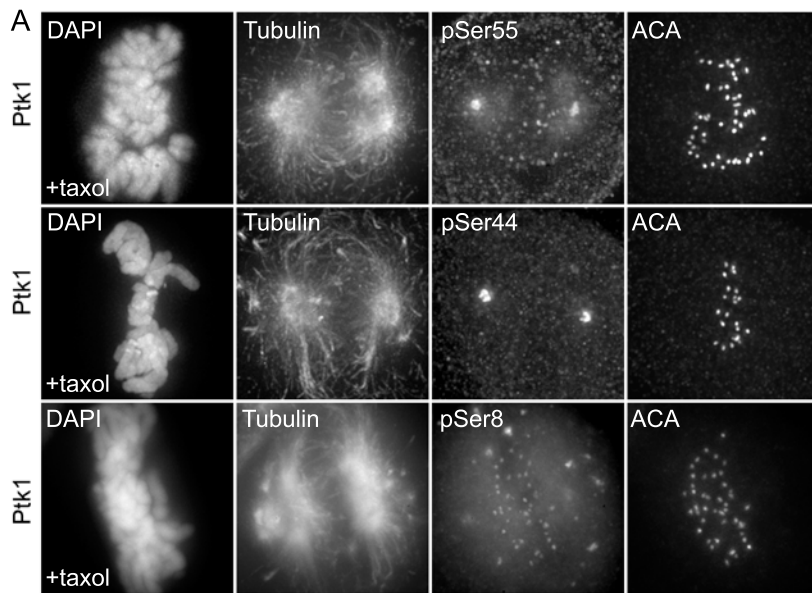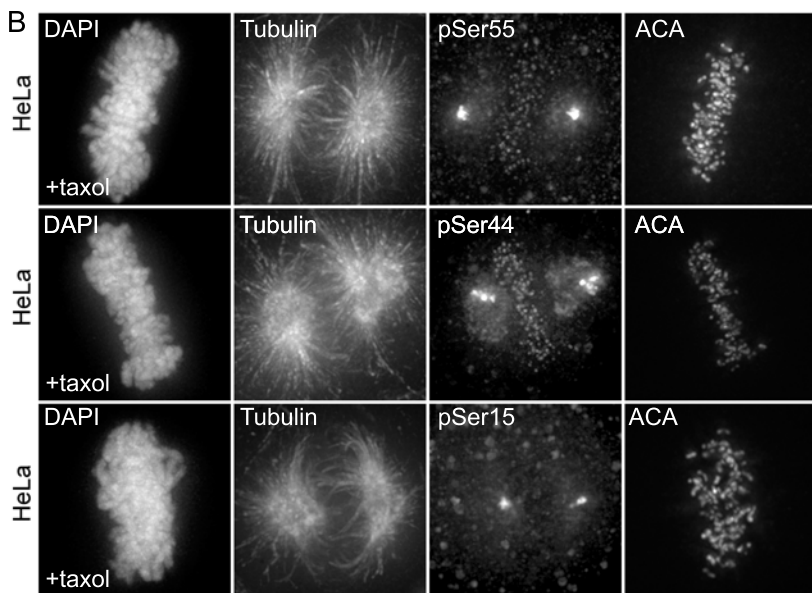

Supplement: supp_124_4_622__7.pdf [file supp_124_4_622__7.pdf]
